# Supplementary material
Source: PubMed Central journal article supplement (PMC7582621)
Supplement: am0c11581_si_001.pdf [file am0c11581_si_001.pdf]

## Supporting Information

### Organic Photovoltaic Pseudocapacitors for Neurostimulation

*Mertcan Han,<sup>1</sup> Shashi Bhushan Srivastava,<sup>1</sup> Erdost Yildiz,<sup>2</sup> Rustamzhon Melikov,<sup>1</sup> Saliha Surme,<sup>3</sup> Itir Bakis Dogru-Yuksel,<sup>4</sup> Ibrahim Halil Kavakli,<sup>3,5</sup> Afsun Sahin,<sup>2,6</sup> Sedat Nizamoglu<sup>1,4,\*</sup>*

<sup>1</sup>Department of Electrical and Electronics Engineering, Koc University, Istanbul 34450, Turkey

<sup>2</sup>Koc University Research Center for Translational Medicine, Koc University, Istanbul 34450, Turkey

<sup>3</sup>Molecular Biology and Genetics, College of Science, Koc University, Istanbul 34450, Turkey

<sup>4</sup>Graduate School of Biomedical Sciences and Engineering, Koc University, Istanbul 34450, Turkey

<sup>5</sup>College of Engineering, Chemical and Biological Engineering, Koc University, Istanbul 34450, Turkey

<sup>6</sup>Department of Ophthalmology, Medical School Koc University, Istanbul 34450, Turkey

\*Correspondence: [snizamoglu@ku.edu.tr](mailto:snizamoglu@ku.edu.tr)

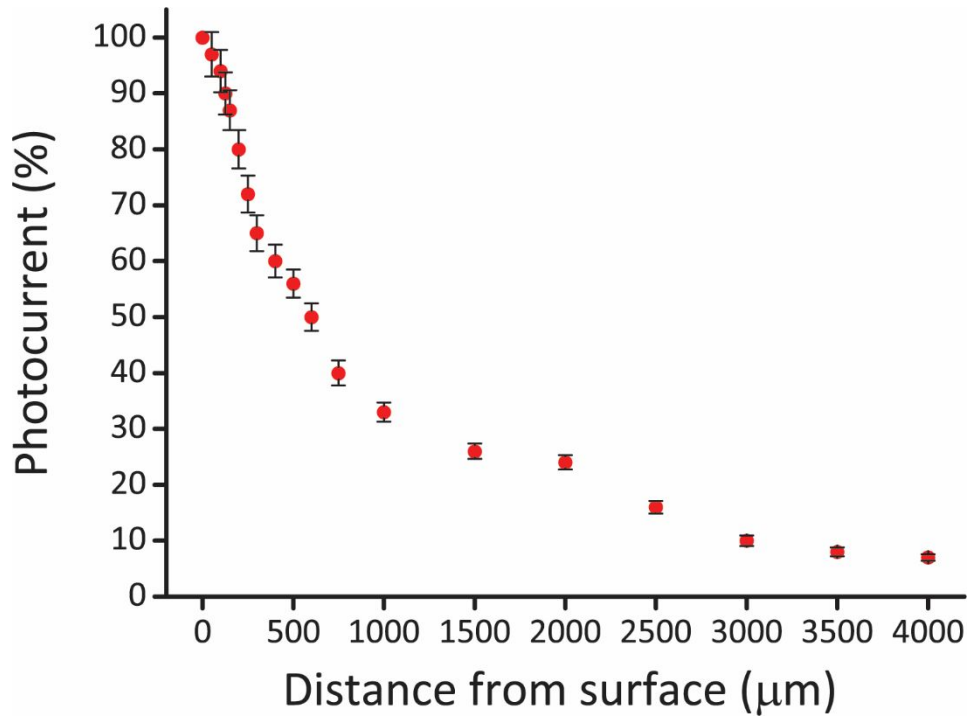

**Figure S1.** Photocurrent gradient with respect to increasing distance from the biointerface surface.

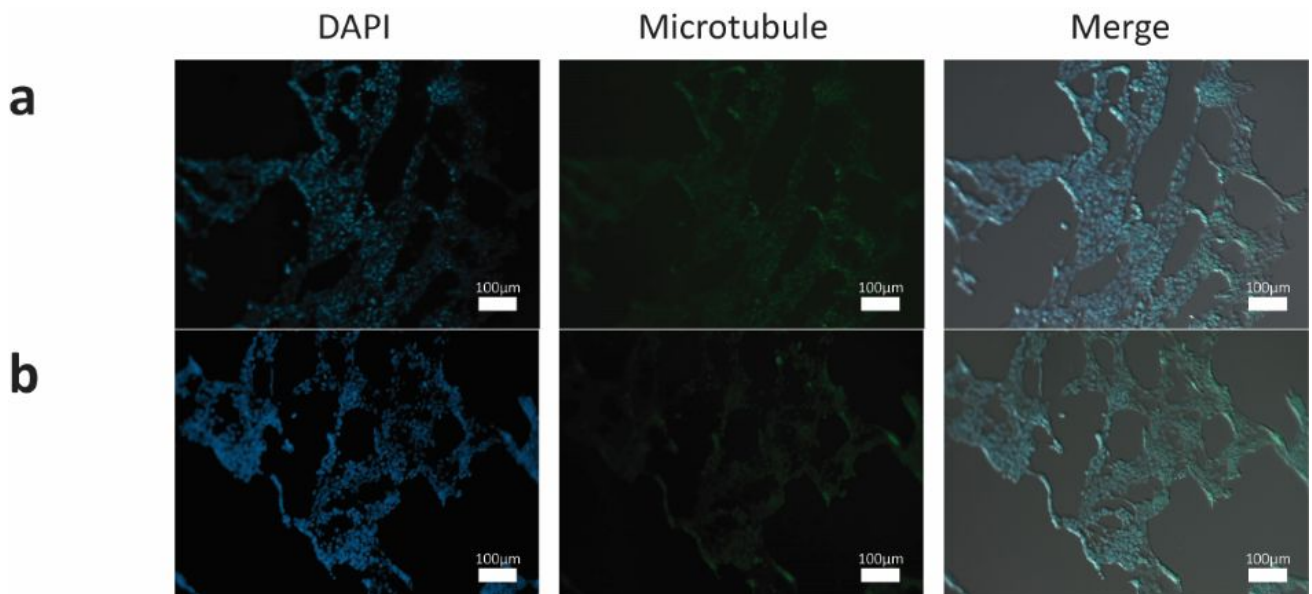

**Figure S2.** To evaluate the effect of the device on the cells a) ITO control and b) the biointerface on the cell morphology visualized by fluorescence microscopy after DAPI staining and phase contrast imaging (scale bar: 100  $\mu\text{m}$ ).

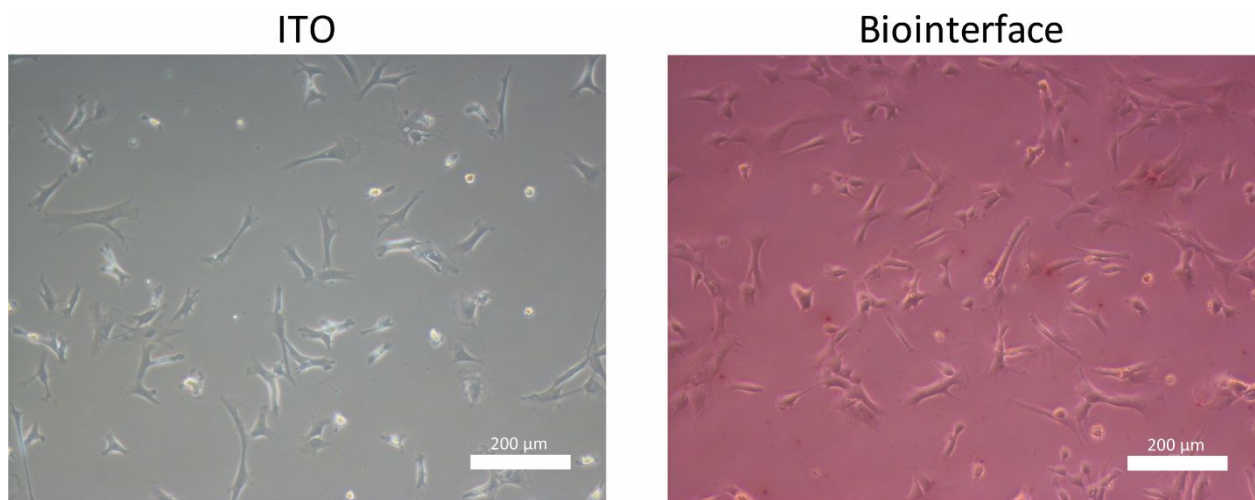

**Figure S3.** Phase-contrast microscope images of primary astrocytes on the ITO control and the biointerface (scale bar: 200 μm).

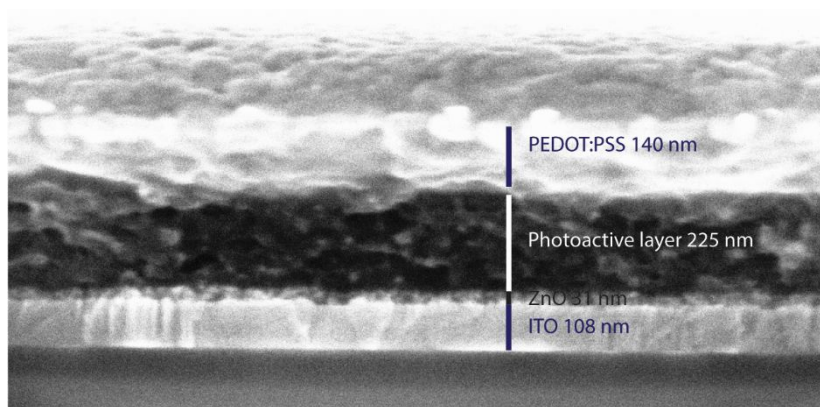

**Figure S4.** Cross-sectional SEM image of the biointerface.
